1           Membrane curvature and the Tol-Pal complex determine polar  
2                           localization of the chemoreceptor Tar in *E. coli*

3

4

5                           Terrens N. V. Saaki <sup>1</sup>, Henrik Strahl <sup>2</sup>, Leendert W. Hamoen <sup>1,#</sup>

6

7

8

9           <sup>1</sup> Swammerdam Institute for Life Sciences, University of Amsterdam, Science Park 904, 1098

10   XH Amsterdam, The Netherlands

11   <sup>2</sup> Centre for Bacterial Cell Biology, Institute for Cell and Molecular Biosciences, Newcastle

12   University, Newcastle NE2 4AX, United Kingdom

13

14   # For correspondence: L. W. Hamoen, Email: [l.w.hamoen@uva.nl](mailto:l.w.hamoen@uva.nl), Tel.: 0031-615085377

15

16   Running title: Membrane curvature and Tol-Pal drive Tar localization

17 **Abstract**

18

19 Chemoreceptors are localized at the cell poles of *Escherichia coli* and other rod-shaped  
20 bacteria. Over the years different mechanisms have been put forward to explain this polar  
21 localization; from stochastic clustering, membrane curvature driven localization, interactions  
22 with the Tol-Pal complex, to nucleoid exclusion. To evaluate these mechanisms, we monitored  
23 the cellular localization of the aspartate chemoreceptor Tar in different deletion mutants. We  
24 did not find any indication for either stochastic cluster formation or nucleoid exclusion.  
25 However, the presence of a functional Tol-Pal complex appeared to be essential to retain Tar  
26 at cell poles. This finding also implies that the curvature of cell poles does not attract  
27 chemoreceptor complexes. Interestingly, Tar still accumulated at midcell in *tol* and in *pal*  
28 deletion mutants. In these mutants, the protein appears to gather at the base of division septa,  
29 a region characterised by strong membrane curvature. Chemoreceptors, like Tar, form trimer-  
30 of-dimers that bend the cell membrane due to a rigid tripod structure with an estimated  
31 curvature of approximately 37 nm. This curvature approaches the curvature of the cell  
32 membrane generated during cell division, and localization of chemoreceptor tripods at curved  
33 membrane areas is therefore energetically favourable as it lowers membrane tension. Indeed,  
34 when we introduced mutations in Tar that abolish the rigid tripod structure, the protein was no  
35 longer able to accumulate at midcell or cell poles. These findings favour a model where  
36 chemoreceptor localization in *E. coli* is driven by strong membrane curvature and association  
37 with the Tol-Pal complex.

38

39 **Importance**

40 Bacteria have exquisite mechanisms to sense and to adapt to the environment they live in.  
41 One such mechanism involves the chemotaxis signal transduction pathway, in which  
42 chemoreceptors specifically bind certain attracting or repelling molecules and transduce the  
43 signals to the cell. In different rod-shaped bacteria, these chemoreceptors localize specifically  
44 to cell poles. Here, we examined the polar localization of the aspartate chemoreceptor Tar in

45 *E. coli*, and found that membrane curvature at cell division sites and interaction with the Tal-  
46 pol protein complex, localize Tar at cell division sites, the future cell poles. This study shows  
47 how membrane curvature can guide localization of proteins in a cell.

48

## 49 Introduction

50

51 Bacteria use specific chemotaxis systems to sense chemical changes in their environment  
52 and respond accordingly. One of the best-known systems is that of *Escherichia coli*, which  
53 comprises five different membrane spanning chemoreceptors. The cytoplasmic domains of  
54 chemoreceptors associate with the adaptor protein CheW and with the histidine kinase CheA.  
55 When a receptor binds a specific ligand, CheA is activated and will subsequently  
56 phosphorylate the response regulator CheY, which acts on the flagellar motor to change  
57 rotation direction. Sensitivity of the chemoreceptors is tuned by methylation and demethylation  
58 for which the methylesterase CheB and methyltransferase CheR are responsible. The  
59 chemoreceptors are therefore also referred to as methyl-accepting chemotaxis proteins or  
60 MCPs. For an in-depth review on the chemotaxis system see e.g. (1, 2).

61 MCPs form large protein clusters together with CheW, -Y, -A, -B and -R at the cell  
62 poles of different bacteria including the Gram-negative model system *E. coli* and the Gram-  
63 positive model system *Bacillus subtilis* (3, 4). Several mechanisms have been proposed for  
64 this polar localization. In long filamentous *E. coli* cells, YFP labelled CheR clusters were found  
65 to assemble with a certain periodicity along the cell axis that corresponds to the position of  
66 future division sites. This model is referred to as the 'stochastic nucleation model' (5-7).  
67 Another theory postulated that MCPs preferably assemble at the curved membrane of cell  
68 poles (8). Chemoreceptors form membrane spanning trimers-of-dimers that interact at their  
69 cytoplasmic domain at a slight angle thereby forming a tripod-like configuration (9).  
70 Consequently, the trimer of dimers prefer bend membrane areas due to the reduced curvature  
71 mismatch. (10, 11). This model was recently supported by mechanically bending of whole *E.*  
72 *coli* cells in curved micro-chambers (12), and was also shown to be the main mechanism by  
73 which the chemoreceptor TlpA of *B. subtilis* is localized (13). However, another study  
74 suggested that polar curvature is not crucial for the localization of chemoreceptor proteins in  
75 *E. coli*, but that this requires interaction with the Tol-Pal complex (14). The trans-envelope Tol-  
76 Pal complex is a widely conserved component of the cell envelope of Gram-negative bacteria,

77 and is involved in several processes among which cell division (15, 16). In contrast to this,  
78 another recent study showed that, at least for the serine chemoreceptor Tsr, the Tol-Pal  
79 complex is not required for polar localization, and that nucleoid exclusion is the driving force  
80 for polar localization of MCPs (17). Here, we evaluated the different polar localization models  
81 in *E. coli* using the aspartate chemoreceptor Tar. We found neither evidence for periodic  
82 clustering nor for nucleoid exclusion, but both membrane curvature and the Tol-Pal system  
83 appeared to be required for polar localization of Tar in *E. coli*.

## 84 **Results**

85

### 86 **Stochastic nucleation**

87 The stochastic nucleation model has been based on the formation of large YFP-CheR and  
88 CheY-YFP clusters that were regularly spaced with a periodicity of approximately 1  $\mu\text{m}$  (5).  
89 To confirm that MCPs also produce these regular clusters, the *E. coli* chemoreceptor Tar was  
90 C-terminally fused with a monomeric GFP variant (mGFP). Since GFP tends to form weak  
91 dimers, monomeric GFP was chosen to prevent possible localization artefacts (18). To reduce  
92 potential artefacts related to protein overexpression, a low copy plasmid with a weakened  
93 IPTG-inducible promoter (pTRC99A (19)) was used to express the fusion protein. As shown  
94 in Fig. 1A, Tar-mGFP shows a classical septal and polar localization pattern. This localization  
95 does not depend on interaction with other chemoreceptors, since expression of the fusion  
96 protein in a MCP deletion strain shows the same localization pattern (Fig. S1).

97 According to the stochastic nucleation model, chemotaxis proteins form large protein  
98 clusters prior to the initiation of cell division. To determine at what time in the cell cycle Tar  
99 accumulates at midcell, we performed a virtual time lapse approach by sorting cells on size  
100 (Fig. 1A, lower panel), and plotting the related fluorescence intensities and cell constriction  
101 (Fig. 1C) (20). As a timer for cell division, we followed the localization of GFP-labelled FtsN,  
102 an essential cell division protein and part of the cell division machinery (21) (Fig. 1B).  
103 Comparison of the localization profiles indicates that Tar appears later at midcell compared to  
104 FtsN, suggesting that clustering of the chemotaxis proteins does not precede cell division.

105 To determine whether Tar forms regularly spaced clusters with a periodicity of around  
106 1  $\mu\text{m}$  in filamentous non-dividing cells, we blocked cell division using the antibiotic cephalixin,  
107 which inactivates the cell division protein FtsI required for septum synthesis (22). As shown in  
108 Fig. 2A & B, no large regularly spaced fluorescent clusters were observed along the lateral  
109 wall of filamentous cells, but the polar clustering remained. Based on these data it seems  
110 unlikely that Tar uses stochastic clustering to accumulate at cell poles.

111

## 112 **Nucleoid exclusion**

113 In a recent report it was suggested that the serine MCP Tsr of *E. coli* is driven to cell poles by  
114 the ‘volume exclusion’ effect of the nucleoid (17). To examine whether nucleoids influence the  
115 distribution of Tar, we stained the cephalixin treated cells with the fluorescence DNA dye  
116 DAPI to visualize the nucleoids (Fig. 2B). We could not detect any correlation with the position  
117 of the nucleoids and the density of Tar-mGFP clusters along the lateral wall (see also line  
118 scans in Fig. 2B, and Fig. S2). To corroborate this, cells were treated with ciprofloxacin, which  
119 inhibits DNA gyrase and blocks DNA replication, resulting in a dense nucleoid at the centre of  
120 long cell, since the activated SOS-response also inhibit cell division (Fig. 2C) (23, 24). Also  
121 under these conditions the Tar-mGFP signal was not reduced at the area occupied by the  
122 nucleoid. Thus, at least for Tar, nucleoid exclusion does not seem to be important for polar  
123 localization.

124

## 125 **CheA stimulated clustering**

126 Clustering of the chemotaxis complex is stimulated by dimerization of the kinase CheA, which  
127 interacts with the cytoplasmic domains of the MCPs (25). In fact, we have found that CheA is  
128 essential to maintain polar localization of the chemoreceptor TlpA in *B. subtilis* (13). However,  
129 it has been shown some time ago that in *E. coli* CheA is not necessary for the polar clustering  
130 of chemoreceptor (26). Indeed, when we expressed Tar-mGFP in a *cheA* deletion mutant  
131 background, the protein accumulated at midcell and cell poles (Fig. 3A).

132

## 133 **Role of Tol-Pal**

134 Another protein that has been implicated in the polar localization of chemoreceptor proteins is  
135 the trans-envelope Tol-Pal complex (14), which accumulates at midcell and assist in the  
136 division of the outer cell membrane (16). Pulldown experiments have suggested a direct  
137 interaction between TolA and chemoreceptors. However, a recent study questioned the role  
138 of the Tol-Pal complex in chemoreceptor localization (17). To verify this, we expressed the  
139 Tar-mGFP fusion in a *pal* deletion mutant. Indeed, the polar accumulation of the fusion protein

140 was completely abolished, however, there was still a strong accumulation at midcell,  
141 comparable to what is observed in wild type cells (Fig. 3B & D). When the fusion protein was  
142 expressed in a *tolA* deletion mutant, a similar localization pattern was observed (Fig. S3). This  
143 seemingly contradictory finding (no polar but still midcell accumulation) might explain the  
144 different reports on the role of Tol-Pal.

145 During cell division, a double cell membrane is formed when the division septum is  
146 synthesized. This will give a higher fluorescent membrane signal at midcell, so even when Tar  
147 is unable to localize and diffuses freely throughout the cell membrane, the extra cell  
148 membranes at the division sites could, in theory, account for an increase in GFP signal at  
149 midcell. To assess this, we followed the localization of a general transmembrane protein, the  
150 glycerol-3-phosphate transporter GlpT (27), throughout the cell cycle in the *pal* mutant.  
151 Indeed, the GFP signal showed a slight accumulation at midcell when cells started to divide  
152 (Fig. 3 C), however, the signal intensity was much lower compared to that of Tar-mGFP (Fig.  
153 3 D), indicating that the double cell membrane at the division site is not responsible for the  
154 strong fluorescence Tar-mGFP signal at midcell.

155

### 156 **Membrane curvature**

157 A closer inspection of the *pal* mutant revealed that the Tar-mGFP signal often appears as two  
158 fluorescent dots at midcell (Fig. 3B), suggesting that Tar accumulates as a ring at midcell. The  
159 Tol-Pal complex is recruited to the division site by FtsN, and links invagination of the outer  
160 membrane with that of the cell membrane during cell division (16). Inactivation of Tol-Pal  
161 strongly delays invagination of the outer membrane compared to the cell membrane, and this  
162 results in the formation of a division septum that resembles the septal cross walls in Gram-  
163 positive bacteria (28). The consequence of such mode of division is that the cell membrane at  
164 the transition from the lateral wall to the nascent septal wall is strongly curved (29). This is  
165 where the Tar-mGFP fluorescent signal seems to accumulate in the *pal* deletion mutant (Fig.  
166 3B). Presumably, Tar localizes at this region because of the curvature mismatch generated  
167 by the tripod configuration of the trimer-of-dimers in combination with the stiffness of the



168 dimers (30). Tension in the membrane is released when these tripods locate to regions of the  
169 cell with a corresponding membrane curvature, such as those found at cell division sites. To  
170 confirm this, we introduced a N379R mutation in the trimerization site of Tar, corresponding  
171 to the N381R mutation in Tsr, which has been shown to abolish trimerization (31). Since single  
172 membrane spanning MCP dimers will not deform the membrane, they should therefore not  
173 accumulate at cell division sites when membrane curvature is the main driver for localization  
174 (Fig. 4A). Indeed, the N379R mutation resulted in the absence of a clear septal and polar  
175 fluorescent signal (Fig. 4B & D). When we increased the flexibility of the dimers by introducing  
176 a stretch of 3 glycines in the HAMP domain (G248G D249G L250G) of the dimers, Tar was  
177 also no longer able to accumulate at midcell and cell poles (Fig. 4C & D), in line with the  
178 assumption that the unstructured glycine stretch eliminates the membrane curvature  
179 preference of the trimer (Fig. 4A) (12, 13). Thus, membrane curvature seems to drive the  
180 localization of Tar trimers-of-dimers.

181

## 182 Discussion

183

184 Our data suggests that the MCPs of *E. coli* and *B. subtilis* arrive at cell poles by a comparable  
185 mechanism. First, they accumulate at midcell when during cell division the cell membrane  
186 takes on a strong concave (seen from the cytoplasmic face) shape at the base of the nascent  
187 septum. Based on a composite crystal structure the curvature of one trimer-of-dimers was  
188 calculated to amount to a radius of approximately 37 nm (8). The membrane curvature  
189 mismatch is reduced considerably when a trimer-of-dimer is located at the base of the nascent  
190 division septum. After septation is completed, *B. subtilis* chemoreceptor clusters are  
191 maintained at the newly formed poles by forming large protein clusters that require CheA.  
192 However, in *E. coli*, the Tol-Pal complex is required to keep chemoreceptors clustered at the  
193 newly formed cell poles, instead of CheA. Co-immunoprecipitation experiments have  
194 suggested a direct interaction between this complex and chemoreceptor proteins (14). Since  
195 lateral diffusion of the large trans-envelope Tol-Pal complex is likely to be hampered by the  
196 peptidoglycan layer, interactions between Tol-Pal and chemoreceptor proteins might anchor  
197 MCPs and maintain their polar localization.

198 Several papers have argued that the curvature of the *E. coli* cell pole is sufficient to  
199 attract MCP trimers (8, 12, 32). However, the polar localization of Tar-mGFP is completely  
200 abolished when Tol-Pal is absent. This indicates that the curvature at the cell pole is not  
201 sufficient to markedly reduce the membrane curvature mismatch created by the Tar trimer-of-  
202 dimers. This is maybe not so surprising since the cell pole has a curvature with a radius of  
203 approximately 500 nm, which is much larger compared to the 37 nm radius of MCP trimer-  
204 dimers (8). Moreover, the cylindrical later wall has a radius that is comparable to that of the  
205 cell pole, which makes the perceived curvature increase of cell poles even smaller.

206 Over the years different mechanisms have been postulated and contradictory results  
207 have been obtained in the research of polar localization of *E. coli* chemoreceptors. One  
208 possible explanation is that different groups use different protein reporters for  
209 chemoreceptors. In many studies, the cytoplasmic CheR has been used as a proxy for

210 chemoreceptor clusters (5, 12, 14), while others have looked directly at the localization of  
211 MCPs (17). Another reason might be the use of fluorescent protein reporters with a tendency  
212 to dimerize, such as YFP and GFP. This characteristic has been shown to cause localization  
213 artefacts, especially when used with proteins that form multimers (18). Finally, we cannot  
214 exclude that different chemoreceptor use different mechanisms for localization. Nevertheless,  
215 both in *E. coli* and in *B. subtilis* it appears that the strong curvature generated during cell  
216 division is a key driving force for the localization of MCPs.

217

## 218 **Materials and methods**

219

### 220 **Bacterial strains and growth conditions**

221 All strains used in this study are listed in Table S1. Strains were grown in GB1 minimal medium  
222 (6.33 g/l  $K_2HPO_4 \cdot 3H_2O$ , 2.95 g/l  $KH_2PO_4$ , 1.05 g/l  $(NH_4)_2SO_4$ , 0.10 g/l  $MgSO_4 \cdot 7H_2O$ , 28 mg/l  
223  $FeSO_4 \cdot 7H_2O$ , 7.10 mg/l  $Ca(NO_3)_2 \cdot 4H_2O$ ) supplemented with vitamin B1 (4 mg/ml) and 0.4 %  
224 glucose as carbon-source, as previously described (33, 34). Auxotrophic BW25113 cells  
225 required arginine (50  $\mu$ g/ml), glutamine (50  $\mu$ g/ml), uracil (20  $\mu$ g/ml), and thymidine (2  $\mu$ g/ml).  
226 Either 100  $\mu$ g/ml (or 5  $\mu$ g/ml in cases of *pal* or *tolA* mutant) of ampicillin or 25  $\mu$ g/ml of  
227 chloramphenicol was added to the growth medium to maintain plasmids.

228

### 229 **Plasmid construction**

230 Purified DNA amplicons were used in a 1:10 molar ratio of vector to insert(s) in Gibson  
231 Assembly reaction (20  $\mu$ l) at 50°C for 60 minutes. 5  $\mu$ l of each Gibson Assembly reaction mix  
232 was used to transform ultra-competent *E. coli* TOP 10 cells. Ultra-competent *E. coli* TOP 10  
233 cells were prepared as described in Hanahan *et al.* (35). Plasmids were sequenced to confirm  
234 constructs. Plasmids were transformed into chemically competent BW23115 wild type or  
235 mutant cells, prepared as described in Maniatis *et al.* (36). Transformants were selected on  
236 selective LB agar plates containing the appropriate concentration of antibiotic. Oligos (Table  
237 S3) and plasmids (Table S2) used in this study are listed in the supplementary information.

238 To construct Tar-mGFP fusion, the point mutation GFP(A206K) was introduced in  
239 plasmid pBAD24-Tar-GFP (37) to prevent dimerization of GFP (18). The mutation was made  
240 by quick change using primer pair GFP(A206K)-for/GFP(A206K)-rev, resulting in plasmid  
241 pBAD24-Tar-mGFP. To express Tar-mGFP from a weakened isopropyl  $\beta$ -D-thiogalactoside  
242 (IPTG)-inducible promoter (19) and low copy number plasmid, the pBAD promoter was  
243 replaced by the pTRC99A promoter from pSAV57 (33), and the pSC101 origin with origin m  
244 pSEN29 (38). First, pBAD24-Tar-mGFP was linearized by PCR amplification using primer pair  
245 TerS327/TerS328, then the pSC101 origin was amplified with primer pair TerS425/TerS426,

246 and subsequently both products were ligated by Gibson Assembly (39), resulting in plasmid  
247 pTNV107 (pBAD24-Tar-mGFP-pSC101 ori). To obtain the weak IPTG-inducible low copy  
248 number plasmid, plasmid pTNV107 was linearized with primer pair TerS425/TerS507, and the  
249 pTRC99A promoter was amplified from pSAV057 using primer pair TerS328/TerS506. The  
250 products were ligated using Gibson Assembly, resulting in pTNV149 (pTRC99A-Tar-mGFP-  
251 pSC101 ori).

252 To test if curvature caused by trimer-of-dimers is essential for Tar-mGFP localization,  
253 we introduced a N379R point mutation in Tar that abolishes the interaction between dimers.  
254 The primer sets TerS328/TerS517 and TerS425/457 were used to introduce N379R in  
255 pTNV149 (pTRC99A-Tar-mGFP-pSC101 ori) using Gibson Assembly, resulting in plasmid  
256 pTNV154 (pTRC99A-Tar(N379R)-mGFP-pSC101 ori). We also introduced a stretch of 3-  
257 glycines in the HAMP domain of Tar to make the dimers flexible. Primer pairs  
258 TerS328/TerS516 and TerS425/515 were used to introduce G248G D249G L250G in Tar in  
259 pTNV149 (pTRC99A-Tar-mGFP-pSC101 ori), resulting in plasmid pTNV153 ((pTRC99A-  
260 Tar(G248G D249G L250G-mGFP-pSC101 ori).

261 To compare midcell localization of Tar-mGFP to divisome assembly, we used the late  
262 cell division protein FtsN fused to monomeric GFP. The mGFP-FtsN fusion was constructed  
263 by PCR amplification of pTNV149 with primer pair TerS418/520, a monomeric variant of *gfp*  
264 from pTNV100 with primer pair TerS362/521, and *ftsN* from *E. coli* genomic DNA with primer  
265 pair TerS523/541 followed by Gibson Assembly, resulting in plasmid pTNV155 (pTRC99A-  
266 mGFP-FtsN-pSC101 ori).

267 As a control for membrane localization, we constructed a glycerol-3-phosphate  
268 transporter GlpT-GFP fusion. mGFP-GlpT was made by PCR amplification of pTNV149 with  
269 primer pair TerS418/520, a monomeric variant of *gfp* from pTNV100 with primer pair  
270 TerS362/521, and *glpT* from *E. coli* genomic DNA with primer pair TerS544/545, followed by  
271 Gibson Assembly, resulting in plasmid pTNV162 (pTRC99A- mGFP-GlpT-pSC101 ori).

272

273 **Microscopy and image analysis**

274 The virtual time lapse is based on the fact that during steady state growth the average mass  
275 of all cells and their age frequency distribution are constant allowing precise spatio-temporal  
276 information on protein localization during the cell cycle, as described in (40). Steady state was  
277 obtained by growing cells in GB1 medium at 30 °C under shaking (210 rpm) while keeping  
278 OD<sub>450</sub> below 0.2 by regular dilution in pre-warmed medium for three days to reach steady state  
279 growth. At steady state, Tar-mGFP was induced with 15 µM of IPTG for at least two-doubling  
280 times. Steady-state cells were centrifuged at 1000 RPM for 2 minutes to bring the OD<sub>450</sub> to  
281 ~0.4.

282 0.3 µl cells were spotted onto a microscope slide covered with a thin layer of 1.3%  
283 agarose. When applicable, cells were treated with 15 µg/ml cephalixin for 1 to 4 h, or 0.035  
284 µg/ml ciprofloxacin for 1 h. Images were acquired with 500 ms exposure time for the GFP  
285 channel. Fluorescent microscopy was carried out with a Nikon Eclipse Ti equipped with a CFI  
286 Plan Intensilight HG 130 W lamp, a C11440-22CU Hamamatsu ORCA camera, and NIS  
287 elements software, version 4.20.01. Images were analysed using Image J v 1.50i  
288 (<https://imagej.nih.gov/ij/>) and the Image J plugin ObjectJ version 03p (40).

289

290 **Acknowledgements**

291

292 We thank the members of the Bacterial Cell Biology group for useful discussions, especially  
293 Tanneke den Blaauwen for discussions on protein localization in *E. coli*. We would like to  
294 thank Séverin Ronneau (Imperial College London) for constructing the initial monomeric GFP  
295 reporter, and Ikuro Kawagishi (Hosei University), Joen Luirink (VU University), Pierre  
296 Genevaux (CNRS), and Tom Shimizu (AMOLF) for kindly providing us with strains and  
297 plasmids. This research was funded by a Biotechnology and Biological Sciences Research  
298 Council (BBSRC) grant BB/I01327X/1, Marie Curie CIG grant DIVANTI (618452), and NWO  
299 STW-Vici grant 12128.

300

301 **References**

302

- 303 1. **Hazelbauer GL, Falke JJ, Parkinson JS.** 2008. Bacterial chemoreceptors: high-  
304 performance signaling in networked arrays. *Trends in Biochemical Sciences* **33**:9–19.
- 305 2. **Porter SL, Wadhams GH, Armitage JP.** 2011. Signal processing in complex  
306 chemotaxis pathways. *Nature Publishing Group* **9**:153–165.
- 307 3. **Alley MR, Maddock JR, Shapiro L.** 1992. Polar localization of a bacterial  
308 chemoreceptor. *Genes Dev* **6**:825–836.
- 309 4. **Maddock, Shapiro L.** 1993. Polar location of the chemoreceptor complex in the  
310 *Escherichia coli* cell. *Science* **259**:1717–1723.
- 311 5. **Thiem S, Kentner D, Sourjik V.** 2007. Positioning of chemosensory clusters in *E. coli*  
312 and its relation to cell division. *EMBO J* **26**:1615–1623.
- 313 6. **Thiem S, Sourjik V.** 2008. Stochastic assembly of chemoreceptor clusters in  
314 *Escherichia coli*. *Mol Microbiol* **68**:1228–1236.
- 315 7. **Greenfield D, McEvoy AL, Shroff H, Crooks GE, Wingreen NS, Betzig E, Liphardt**  
316 **J.** 2009. Self-organization of the *Escherichia coli* chemotaxis network imaged with  
317 super-resolution light microscopy. *PLOS Biol* **7**:e1000137–e1000137.
- 318 8. **Endres RG.** 2009. Polar chemoreceptor clustering by coupled trimers of dimers.  
319 *Biophysical Journal* **96**:453–463.
- 320 9. **Kim S-H, Kim KK, Yokota H.** 1999. Four-helical-bundle structure of the cytoplasmic  
321 domain of a serine chemotaxis receptor : Article : *Nature*. *Nature* **400**:787–792.
- 322 10. **Derganc J.** 2007. Curvature-driven lateral segregation of membrane constituents in  
323 Golgi cisternae. *Phys Biol* **4**:317–324.
- 324 11. **Aimon S, Callan-Jones A, Berthaud A, Pinot M, Toombes GES, Bassereau P.**  
325 2014. Membrane shape modulates transmembrane protein distribution. *Dev Cell*  
326 **28**:212–218.
- 327 12. **Draper W, Liphardt J.** 2017. Origins of chemoreceptor curvature sorting in  
328 *Escherichia coli*. *Nat Commun* **8**:14838.
- 329 13. **Strahl H, Ronneau S, González BS, Klutsch D, Schaffner-Barbero C, Hamoen**  
330 **LW.** 2014. Transmembrane protein sorting driven by membrane curvature. *Nat*  
331 *Commun* **6**:8728–8728.
- 332 14. **Santos TMA, Lin T-Y, Rajendran M, Anderson SM, Weibel DB.** 2014. Polar  
333 localization of *Escherichia coli* chemoreceptors requires an intact Tol-Pal complex.  
334 *Mol Microbiol* **92**:985–1004.
- 335 15. **Sturgis JN.** 2001. Organisation and evolution of the tol-pal gene cluster. *J Mol*  
336 *Microbiol Biotechnol* **3**:113–122.
- 337 16. **Gerding MA, Ogata Y, Pecora ND, Niki H, de Boer PAJ.** 2007. The trans-envelope  
338 Tol-Pal complex is part of the cell division machinery and required for proper outer-



- 339 membrane invagination during cell constriction in *E. coli*. *Mol Microbiol* **63**:1008–1025.
- 340 17. **Neeli-Venkata R, Startceva S, Annila T, Ribeiro AS.** 2016. Polar Localization of the  
341 Serine Chemoreceptor of *Escherichia coli* Is Nucleoid Exclusion-Dependent.  
342 *Biophysical Journal* **111**:2512–2522.
- 343 18. **Landgraf D, Okumus B, Chien P, Baker TA, Paulsson J.** 2012. Segregation of  
344 molecules at cell division reveals native protein localization. *Nat Meth* **9**:480–482.
- 345 19. **Amann E, Ochs B, Abel KJ.** 1988. Tightly regulated tac promoter vectors useful for  
346 the expression of unfused and fused proteins in *Escherichia coli*. *Gene*.
- 347 20. **Blaauwen Den T, Buddelmeijer N, Aarsman M, Hameete CM, Nanninga N.** 1999.  
348 Timing of FtsZ assembly in *Escherichia coli*. *Journal of Bacteriology* **181**:5167–5175.
- 349 21. **Yang JC, van den Ent F, Neuhaus D, Brevier J, Löwe J.** 2004. Solution structure  
350 and domain architecture of the divisome protein FtsN. *Mol Microbiol* **52**:651–660.
- 351 22. **Botta GA, Park JT.** 1981. Evidence for involvement of penicillin-binding protein 3 in  
352 murein synthesis during septation but not during cell elongation. *Journal of*  
353 *Bacteriology* **145**:333–340.
- 354 23. **LeBel M.** 1988. Ciprofloxacin: Chemistry, Mechanism of Action, Resistance,  
355 Antimicrobial Spectrum, Pharmacokinetics, Clinical Trials, and Adverse Reactions.  
356 *Pharmacotherapy: The Journal of Human Pharmacology and Drug Therapy* **8**:3–30.
- 357 24. **Khodursky AB, Cozzarelli NR.** 1998. The mechanism of inhibition of topoisomerase  
358 IV by quinolone antibacterials. *Journal of Biological Chemistry* **273**:27668–27677.
- 359 25. **Kentner D, Thiem S, Hildenbeutel M, Sourjik V.** 2006. Determinants of  
360 chemoreceptor cluster formation in *Escherichia coli*. *Mol Microbiol* **61**:407–417.
- 361 26. **Skidmore JM, Ellefson DD, McNamara BP, Couto MM, Wolfe AJ, Maddock JR.**  
362 2000. Polar clustering of the chemoreceptor complex in *Escherichia coli* occurs in the  
363 absence of complete CheA function. *Journal of Bacteriology* **182**:967–973.
- 364 27. **Oswald F, Varadarajan A, Lill H, Peterman EJG, Bollen YJM.** 2016. MreB-  
365 Dependent Organization of the E-coli Cytoplasmic Membrane Controls Membrane  
366 Protein Diffusion. *Biophysj* **110**:1139–1149.
- 367 28. **Erickson HP.** 2017. How bacterial cell division might cheat turgor pressure – a unified  
368 mechanism of septal division in Gram-positive and Gram-negative bacteria.  
369 *Bioessays* **39**.
- 370 29. **Lenarcic R, Halbedel S, Visser L, Shaw M, Wu LJ, Errington J, Marenduzzo D,**  
371 **Hamoen LW.** 2009. Localisation of DivIVA by targeting to negatively curved  
372 membranes. **28**:2272–2282.
- 373 30. **Kim S-H, Wang W, Kim KK.** 2002. Dynamic and clustering model of bacterial  
374 chemotaxis receptors: structural basis for signaling and high sensitivity. *PNAS*  
375 **99**:11611–11615.
- 376 31. **Gosink KK, Zhao Y, Parkinson JS.** 2011. Mutational Analysis of N381, a Key Trimer  
377 Contact Residue in Tsr, the *Escherichia coli* Serine Chemoreceptor. *Journal of*  
378 *Bacteriology* **193**:6452–6460.

- 379 32. **Haselwandter CA, Wingreen NS.** 2014. The Role of Membrane-Mediated  
380 Interactions in the Assembly and Architecture of Chemoreceptor Lattices. *PLoS*  
381 *Comput Biol* **10**:e1003932.
- 382 33. **Alexeeva S, Gadella TWJ Jr, Verheul J, Verhoeven GS, Blaauwen den T.** 2010.  
383 Direct interactions of early and late assembling division proteins in *Escherichia coli*  
384 cells resolved by FRET. *Mol Microbiol* **77**:384–398.
- 385 34. **Aarsman MEG, Piette A, Fraipont C, Vinkenvleugel TMF, Nguyen Distèche M,**  
386 **Blaauwen den T.** 2005. Maturation of the *Escherichia coli* divisome occurs in two  
387 steps. *Mol Microbiol* **55**:1631–1645.
- 388 35. **Hanahan D, Jessee J, Bloom FR.** 1990. Plasmid transformation of *Escherichia coli*  
389 and other bacteria. *Methods Enzymol* **204**:63–113.
- 390 36. **Maniatis T, Fritsch EF, Sambrook J.** 1982. Molecular cloning: a laboratory manual.
- 391 37. **Shiomi D, Yoshimoto M, Homma M, Kawagishi I.** 2006. Helical distribution of the  
392 bacterial chemoreceptor via colocalization with the Sec protein translocation  
393 machinery. *Mol Microbiol* **60**:894–906.
- 394 38. **Genevaux P, Keppel F, Schwager F, Langendijk-Genevaux PS, Hartl FU,**  
395 **Georgopoulos C.** 2004. In vivo analysis of the overlapping functions of DnaK and  
396 trigger factor. *EMBO reports* **5**:195–200.
- 397 39. **Gibson DG, Young L, Chuang R-Y, Venter JC, Hutchison CAI, Smith HO.** 2009.  
398 Enzymatic assembly of DNA molecules up to several hundred kilobases. *Nat Meth*  
399 **6**:343–U41.
- 400 40. **Vischer NOE, Verheul J, Postma M, van den Berg van Saparoea B, Galli E,**  
401 **Natale P, Gerdes K, Luirink J, Vollmer W, Vicente M, Blaauwen den T.** 2015. Cell  
402 age dependent concentration of *Escherichia coli* divisome proteins analyzed with  
403 ImageJ and ObjectJ. *Front Microbiol* **6**:586.

404

405 **Figure legends**

406

407 **Fig. 1. Localization of Tar-mGFP**

408 (A) Fluorescence microscopy image of wild type *E. coli* cells expressing Tar-mGFP. Lower  
409 panel shows sorted axial fluorescence profiles, indicative for Tar-mGFP localization during the  
410 cell cycle. (B) Fluorescence microscopy image and cell cycle localization profile of cells  
411 expressing mGFP-FtsN. (C) Graphical presentation of cell constriction and fluorescence  
412 signals during the cell cycle calculated from the localization profiles. Cell age is expressed as  
413 % of the cell cycle. 5074 and 6437 cells were used to construct the cell cycle localization  
414 profiles for mGFP-FtsN and Tar-mGFP, respectively. Scale bars are 2  $\mu$ m. Used strains in A  
415 and B are TSE29 and TSE48, respectively.

416

417 **Fig. 2. Tar-mGFP clustering and relation to nucleoid position**

418 (A) Fluorescence microscopy image and localization profile of Tar-mGFP expressing cells  
419 treated with 15  $\mu$ g/ml cephalexin for 1 h. 1872 cells were used to construct the localization  
420 profile. (B) Fluorescence microscopy image of Tar-mGFP expressing cells treated with 15  
421  $\mu$ g/ml cephalexin for 3 h. Nucleoids were stained with DAPI. Line scans for the GFP and DAPI  
422 signals are presented below. More examples are shown in Fig. S2. (C) Fluorescence  
423 microscopy image of Tar-mGFP expressing cells treated with 0.035  $\mu$ g/ml ciprofloxacin for 1  
424 h. Nucleoids were stained with DAPI. Scale bars are 2  $\mu$ m. Used strain is TSE29.

425

426 **Fig. 3. Effect of *cheA* and *pal* deletion mutant on Tar-mGFP localization**

427 (A) Fluorescence microscopy image and localization profile of Tar-mGFP expressing *cheA*  
428 deletion mutant. 5948 cells were used to construct the localization profile. (B) Fluorescence  
429 microscopy image and localization profile of Tar-mGFP expressing *pal* deletion mutant. Arrow  
430 indicates Tar-mGFP foci. 9044 cells were used to construct the localization profile. (C)  
431 Fluorescence microscopy image and localization profile of mGFP-GlpT expressed in the *pal*  
432 deletion mutant. 5214 cells were used to construct the localization profile. (D) Graphical

433 presentation of fluorescence signals during the cell cycle calculated from the localization  
434 profiles. Cell age is expressed as % of the cell cycle. Scale bars are 2  $\mu\text{m}$ . Used strains in A,  
435 B and C are TSE38, TSE31 and TSE71, respectively.

436

437 **Fig. 4. Membrane curvature is important for localization**

438 (A) Schematic presentation of the effect of dimerization mutation N379R and the triple glycine  
439 insertion (G248G D249G L250G) on membrane curvature mismatch. (B) Fluorescence  
440 microscopy image and localization profile of Tar(N379R)-mGFP expressing cells. 7331 cells  
441 were used to construct the localization profile. (C) Fluorescence microscopy image and  
442 localization profile of Tar(G248G D249G L2450G)-mGFP expressing cells. 7856 cells were  
443 used to construct the localization profile. (D) Graphical presentation of fluorescence signals  
444 during the cell cycle calculated from the localization profiles. Cell age is expressed as % of  
445 the cell cycle. Scale bars are 2  $\mu\text{m}$ . Used strains in B and C are TSE41 and TSE42,  
446 respectively, and in D strains TSE29 and TSE67.

447 Fig. 1.

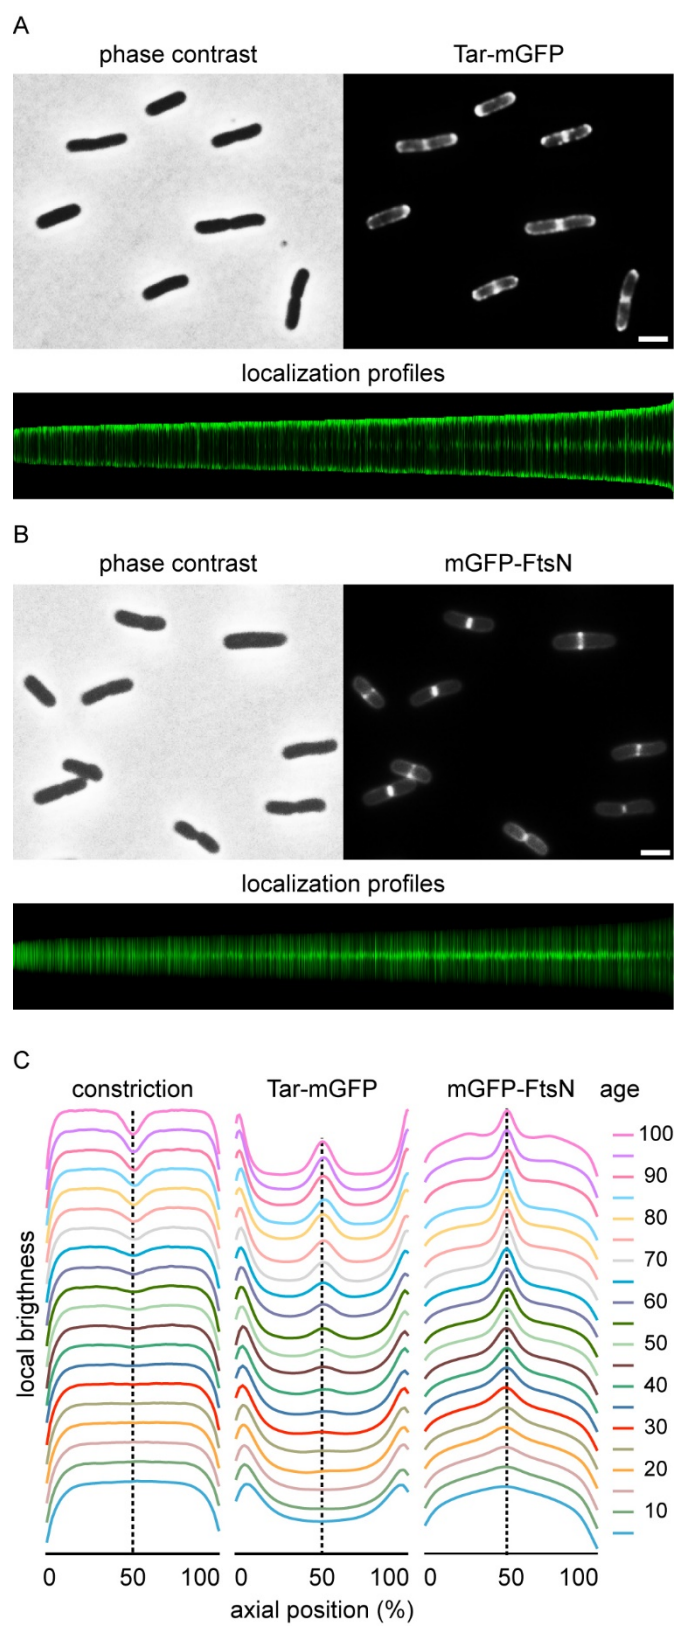

448 Fig. 2.

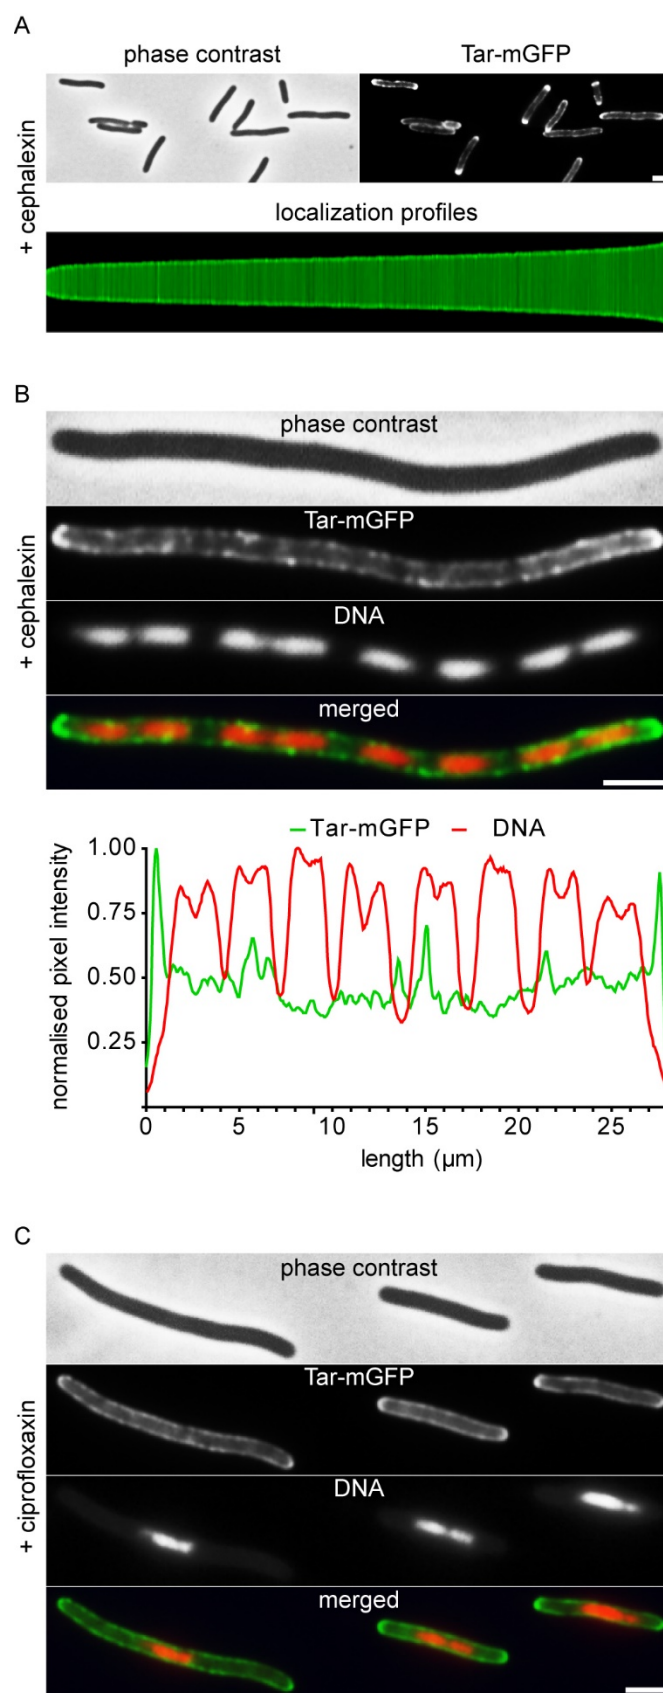



449 Fig. 3.

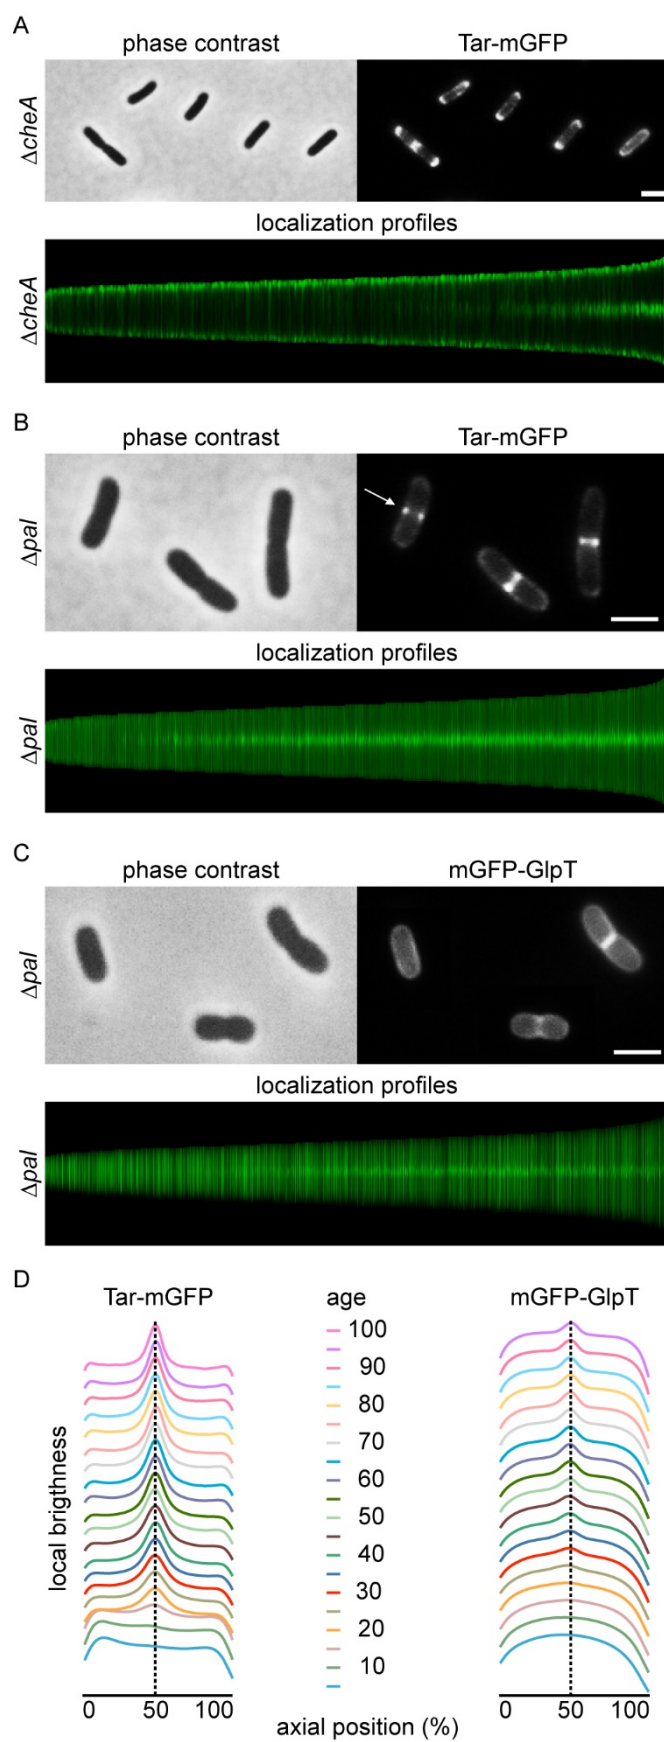

450 Fig. 4.

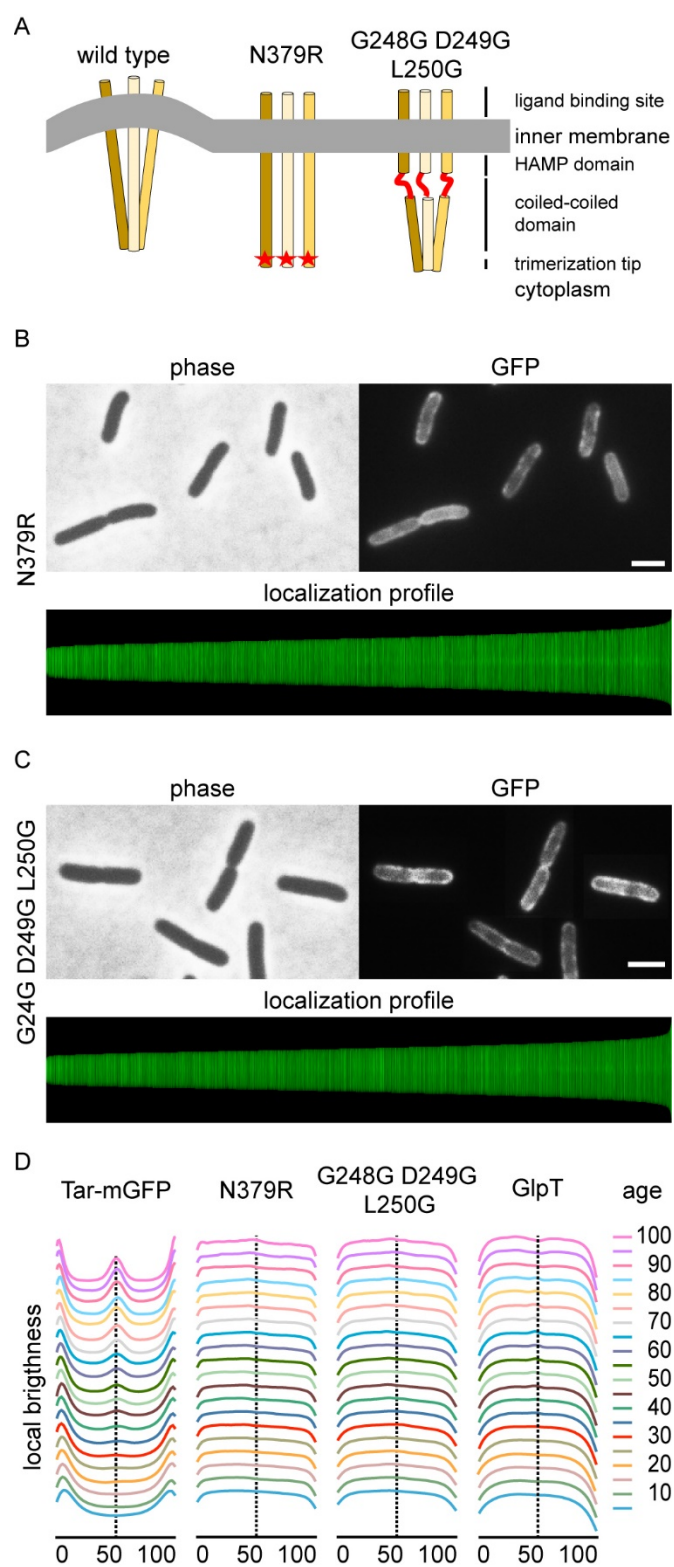

Source: https://www.biorxiv.org/content/10.1101/212670v1.full.pdf
